# Supplementary material for: How negative self-views may interfere with building positive relationships: An experimental analogue of identity dysfunction in borderline personality disorder
Source: PLOS journal article supplement (doi:10.1371/journal.pone.0301196), 2024-03-28
Supplement: S1 (10.1371/journal.pone.0301196.s001) [file journal.pone.0301196.s001.pdf]

## Supplementary information

*To manuscript titled “How negative self-views may interfere with building positive relationships: an experimental analogue of identity dysfunction in borderline personality disorder”*

### Interview Questions for SF Task

*I will now hold a short interview with you. The interview recording will be shared with the panel members so that they can listen to learn more about you and will use this and your answers to make their impressions of you. There are no right answers so please try to answer as honestly as you can.*

- 1. What do you do in daily life?*
- 2. What are your hobbies, interests?*
- 3. How would your friends describe you? Which characteristics?*
- 4. How would you describe yourself? Could you name 3 positive and 3 negative characteristics.*
- 5. What are you proud of? What are you ashamed of?*
- 6. If you could change one thing of yourself what would this be?*
- 7. If you could be someone else for one day, who would you be and why?*
- 8. What would you do in the following situation: You have just paid for your groceries and upon leaving the store you find the cashier returned two dollars too many.*
- 9. What would you do in the following situation: There is a child crying in the street and no one is helping her. You have to take a bus which is just arriving, to visit a friend in hospital who will have surgery.*
- 10. What would you do in the following situation: Your neighbour has Alzheimer and acts very anti-social. She is annoyed when you offer help and proud of her independence. However, she sometimes forgets to turn the stove off or to close the front door. As you walk out you see her door is open.*

S1 Table

Character Trait Words used in SF Task

| <b>Negative</b> | <b>Intermediate</b> | <b>Positive</b> |
|-----------------|---------------------|-----------------|
| Nasty           | Chaotic             | Friendly        |
| Selfish         | Critical            | Confident       |
| Arrogant        | Slow                | Healthy         |
| Mean            | Clumsy              | Funny           |
| Unreliable      | Strict              | Smart           |
| Stupid          | Nervous             | Respectful      |
| Lazy            | Anxious             | Kind            |
| Cold            | Weird               | Grateful        |
| Cowardly        | Reserved            | Honest          |
| Harsh           | Competitive         | Courageous      |
| Bossy           | Serious             | Warm            |
| Pesky           | Quiet               | Generous        |
| Boring          | Talkative           | Loyal           |
| Stubborn        | Neat                | Sincere         |
| Rigid           | Agreeable           | Caring          |

### Manipulation Check Interview Questions for SF Task

1. *How did you experience this study?*
2. *What do you think of the panel members that provided you feedback?*
3. *If you could meet one of the panel members, who would you want to meet and why?*
4. *Has the feedback affected you in any way?*
5. *To what extent do you think the interview sufficed to get an impression of you?*
6. *How confident are you that the feedback was provided by these panel members?*

S2 Table

Distribution of positive, intermediate and negative feedback among the three panel members

| Feedback valence | Panel member 1<br>– predominantly<br>negative | Panel member 2<br>– intermediate | Panel member 3<br>– predominantly<br>positive | Subtotal |
|------------------|-----------------------------------------------|----------------------------------|-----------------------------------------------|----------|
| Positive         | 2                                             | 3                                | 10                                            | 15       |
| Intermediate     | 3                                             | 9                                | 3                                             | 15       |
| Negative         | 10                                            | 3                                | 2                                             | 15       |
| Subtotal         | 15                                            | 15                               | 15                                            | 45       |

S3 Table

Counterbalance orders

| Version             | V1 | V2 | V3 | V4 | V5 | V6 |
|---------------------|----|----|----|----|----|----|
| Negative member     | 1  | 2  | 3  | 1  | 3  | 2  |
| Intermediate member | 2  | 3  | 1  | 3  | 2  | 1  |
| Positive member     | 3  | 1  | 2  | 2  | 1  | 3  |

Note: names of the panel members were matched to the sex of the participant. Female names were: 1) Rose, 2) Sarah, 3) Mia. Male names were: 1) Christian, 2) Tyson, 3) Ethan.

S4 Table

Parameters of model predicting mood by valence, applicability, panel member and valence by applicability interaction

|                                  | Estimate     | Std. Error  | t value      | 95%CI          |                | Std.b        |
|----------------------------------|--------------|-------------|--------------|----------------|----------------|--------------|
|                                  |              |             |              | lower<br>bound | upper<br>bound |              |
| Intercept (Intermediate valence) | 4.69         | 0.21        | 22.21        | 4.28           | 5.09           | 0.00         |
| Negative valence                 | <b>-1.19</b> | <b>0.16</b> | <b>-7.30</b> | <b>-1.50</b>   | <b>-0.88</b>   | <b>-0.28</b> |
| Positive valence                 | <b>0.80</b>  | <b>0.23</b> | <b>3.43</b>  | <b>0.35</b>    | <b>1.25</b>    | <b>0.19</b>  |
| Applicability                    | <b>0.26</b>  | <b>0.03</b> | <b>10.25</b> | <b>0.21</b>    | <b>0.31</b>    | <b>0.27</b>  |
| Negative member                  | <b>-0.16</b> | <b>0.08</b> | <b>-2.01</b> | <b>-0.32</b>   | <b>-0.01</b>   | <b>-0.04</b> |
| Positive member                  | 0.01         | 0.08        | 0.09         | -0.15          | 0.16           | 0.00         |
| Negative valence*Applicability   | <b>0.12</b>  | <b>0.04</b> | <b>3.19</b>  | <b>0.05</b>    | <b>0.19</b>    | <b>0.11</b>  |
| Positive valence*Applicability   | 0.00         | 0.04        | -0.01        | -0.08          | 0.08           | 0.00         |

## S5 Table

Parameters of model predicting mood by valence, applicability, panel member, negative self-views and two-way interactions of valence by applicability, negative self-views by applicability and negative self-views by valence

|                                  | Estimate     | Std. Error  | t value      | 95%CI        |              | Std.b        |
|----------------------------------|--------------|-------------|--------------|--------------|--------------|--------------|
|                                  |              |             |              | lower bound  | upper bound  |              |
| Intercept (Intermediate valence) | 3.95         | 0.73        | 5.45         | 2.53         | 5.36         | 0.00         |
| Negative valence                 | <b>-1.25</b> | <b>0.31</b> | <b>-3.98</b> | <b>-1.87</b> | <b>-0.65</b> | <b>-0.29</b> |
| Positive valence                 | <b>1.77</b>  | <b>0.39</b> | <b>4.55</b>  | <b>1.02</b>  | <b>2.56</b>  | <b>0.41</b>  |
| Applicability                    | <b>0.57</b>  | <b>0.06</b> | <b>8.99</b>  | <b>0.44</b>  | <b>0.69</b>  | <b>0.60</b>  |
| Negative self-views              | 0.26         | 0.22        | 1.21         | -0.17        | 0.68         | 0.11         |
| Negative member                  | -0.35        | 0.29        | -1.18        | -0.92        | 0.23         | -0.08        |
| Positive member                  | -0.22        | 0.29        | -0.74        | -0.78        | 0.35         | -0.05        |
| Negative valence*Applicability   | 0.07         | 0.04        | 1.81         | 0.00         | 0.15         | 0.06         |
| Positive valence*Applicability   | -0.01        | 0.04        | -0.36        | -0.09        | 0.06         | -0.02        |
| Negative valence*Neg self-views  | 0.07         | 0.10        | 0.70         | -0.12        | 0.26         | 0.05         |
| Positive valence*Neg self-views  | <b>-0.28</b> | <b>0.09</b> | <b>-3.04</b> | <b>-0.47</b> | <b>-0.10</b> | <b>-0.23</b> |
| Negative member*Neg self-views   | 0.06         | 0.09        | 0.66         | -0.11        | 0.23         | 0.05         |
| Positive member*Neg self-views   | 0.07         | 0.09        | 0.75         | -0.10        | 0.23         | 0.05         |
| Applicability*Neg self-views     | <b>-0.10</b> | <b>0.02</b> | <b>-5.45</b> | <b>-0.14</b> | <b>-0.06</b> | <b>-0.42</b> |

S6 Table  
Parameters of model predicting connectedness by panel member and negative self-views

|                                 | Estimate     | Std.Error   | t value      | 95% CI         |                | std.b        |
|---------------------------------|--------------|-------------|--------------|----------------|----------------|--------------|
|                                 |              |             |              | lower<br>bound | upper<br>bound |              |
| <b>Closeness</b>                |              |             |              |                |                |              |
| Intercept (Intermediate member) | 3.51         | 0.89        | 3.95         | 1.76           | 5.30           | 0.00         |
| Negative member                 | <b>-1.37</b> | <b>0.52</b> | <b>-2.63</b> | <b>-2.41</b>   | <b>-0.34</b>   | <b>-0.33</b> |
| Positive member                 | <b>1.46</b>  | <b>0.52</b> | <b>2.79</b>  | <b>0.42</b>    | <b>2.49</b>    | <b>0.35</b>  |
| Negative self-views             | 0.14         | 0.26        | 0.55         | -0.37          | 0.68           | 0.07         |
| Negative member*Neg self-views  | 0.18         | 0.15        | 1.19         | -0.12          | 0.49           | 0.15         |
| Positive member*Neg self-views  | <b>-0.31</b> | <b>0.15</b> | <b>-2.01</b> | <b>-0.61</b>   | <b>-0.01</b>   | <b>-0.26</b> |
| <b>Trust</b>                    |              |             |              |                |                |              |
| Intercept (Intermediate member) | 4.73         | 0.83        | 5.67         | 3.06           | 6.34           | 0.00         |
| Negative member                 | -1.14        | 0.57        | -2.01        | -2.27          | 0.01           | -0.28        |
| Positive member                 | <b>1.61</b>  | <b>0.57</b> | <b>2.83</b>  | <b>0.44</b>    | <b>2.72</b>    | <b>0.39</b>  |
| Negative self-views             | -0.06        | 0.25        | -0.26        | -0.54          | 0.42           | -0.03        |
| Negative member*Neg self-views  | 0.13         | 0.17        | 0.75         | -0.21          | 0.47           | 0.10         |
| Positive member*Neg self-views  | -0.33        | 0.17        | -1.99        | -0.66          | 0.01           | -0.28        |
| <b>Liking</b>                   |              |             |              |                |                |              |
| Intercept (Intermediate member) | 5.58         | 0.64        | 8.68         | 4.31           | 6.82           | 0.00         |
| Negative member                 | <b>-1.71</b> | <b>0.57</b> | <b>-3.01</b> | <b>-2.83</b>   | <b>-0.60</b>   | <b>-0.46</b> |
| Positive member                 | <b>1.62</b>  | <b>0.57</b> | <b>2.84</b>  | <b>0.50</b>    | <b>2.74</b>    | <b>0.43</b>  |
| Negative self-views             | -0.003       | 0.19        | -0.01        | -0.37          | 0.37           | 0.00         |
| Negative member*Neg self-views  | 0.21         | 0.17        | 1.25         | -0.12          | 0.54           | 0.20         |
| Positive member*Neg self-views  | <b>-0.35</b> | <b>0.17</b> | <b>-2.07</b> | <b>-0.68</b>   | <b>-0.02</b>   | <b>-0.32</b> |
